# Supplementary material for: Bioprinted biomimetic hydrogel matrices guiding stem cell aggregates for enhanced chondrogenesis and cartilage regeneration
Source: Royal Society of Chemistry journal article supplement (doi:10.1039/d4tb00323c), 2024-01-01
Supplement: d4tb00323c1.pdf [file d4tb00323c1.pdf]

## Supporting Information

### **Bioprinted Biomimetic Hydrogel Matrices Guiding Stem Cell Aggregates for Enhanced Chondrogenesis and Cartilage Regeneration**

Yuetian Liu<sup>1, 2#</sup>, Lijuan Du<sup>2#</sup>, Hua Zhang<sup>2, 4\*</sup>, Guanrong Li<sup>1, 2</sup>, Yang Luo<sup>1, 2</sup>, Zeming Hu<sup>2</sup>, Rong Xu<sup>1, 2</sup>, Jie Yao<sup>1</sup>, Zheyuan Shi<sup>1, 2</sup>, Yige Chen<sup>2</sup>, Chi Zhang<sup>1</sup>, Zhanping Jin<sup>1</sup>, Caihua Zhang<sup>1</sup>, Chanchan Xie<sup>1</sup>, Jun Fu<sup>3\*</sup>, Yabin Zhu<sup>2\*</sup>, Yingchun Zhu<sup>1\*</sup>

<sup>1</sup> The First Affiliated Hospital of Ningbo University, Ningbo, Zhejiang 315010, China

<sup>2</sup> Research Institute of Smart Medicine and Biological Engineering, Health Science Center, Ningbo University, Ningbo, Zhejiang 315211, China

<sup>3</sup> Key Laboratory of Polymeric Composite and Functional Materials of Ministry of Education, Guangdong Engineering Technology Research Centre for Functional Biomaterials, School of Materials Science and Engineering, Sun Yat-Sen University, Guangzhou, 510275 China

<sup>4</sup> State Key Laboratory of Molecular Engineering of Polymers (Fudan University), Shanghai 200438, China

**\*Corresponding Authors:** fyyzhuyingchun@nbu.edu.cn; zhanghua@nbu.edu.cn; zhuyabin@nbu.edu.cn; fujun8@mail.sysu.edu.cn

**#**These authors contributed equally to this work.

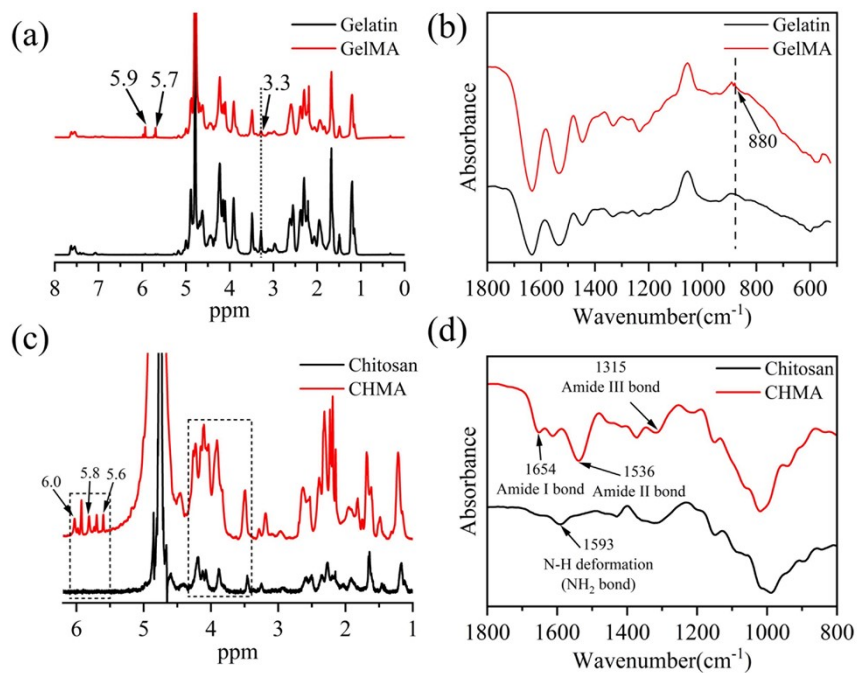

**Figure S1.** (a) <sup>1</sup>H-NMR and (b) FT-IR spectra of gelatin and gelatin methacrylate (GelMA). (c) <sup>1</sup>H-NMR and (d) FT-IR spectra of chitosan and chitosan methacrylate (CHMA).

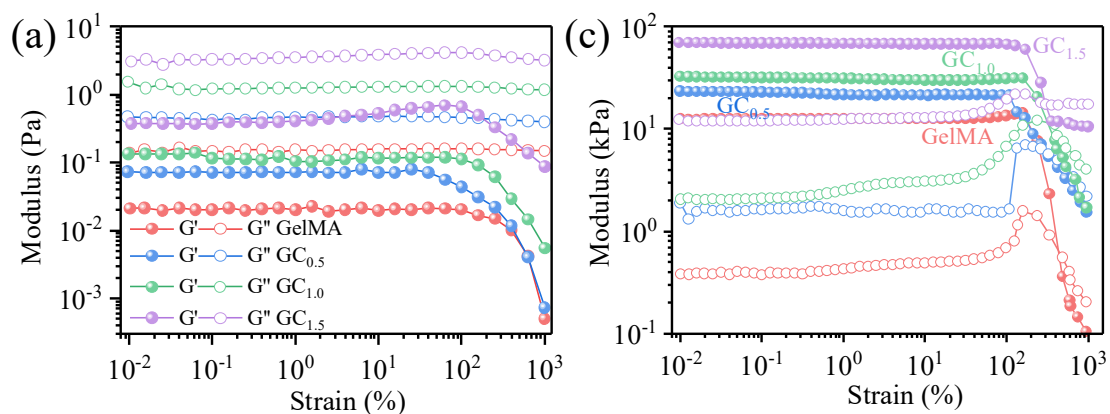

**Figure S2.** Amplitude sweep analysis of the GelMA and GC<sub>m</sub> precursors (a) and their hydrogels (b) at 37 °C.

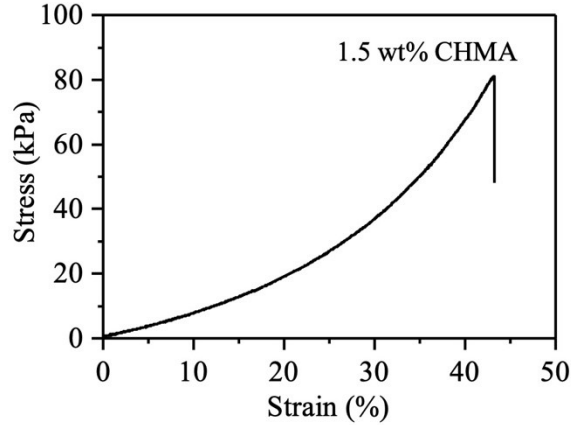

**Figure S3.** Compression stress-strain curve of the CHMA hydrogels.

**Table S1.** Polymer network pore sizes of hydrogels analyzed using rubber elastic theory.

| Group             | G (kPa) | V (nm <sup>3</sup> ) |
|-------------------|---------|----------------------|
| 10 wt% GelMA      | 12.66   | 338.1                |
| GC <sub>0.5</sub> | 22.12   | 193.5                |
| GC <sub>0.5</sub> | 32.59   | 131.3                |
| GC <sub>0.5</sub> | 70.22   | 60.9                 |

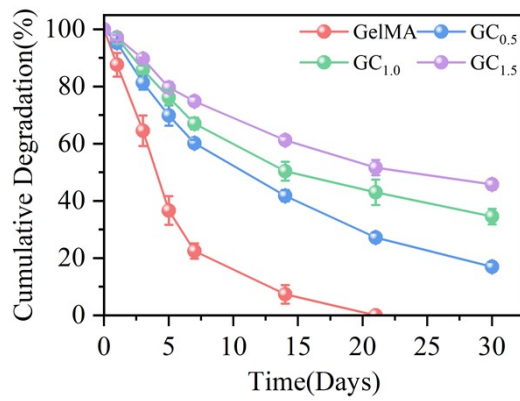

**Figure S4.** The *in-vitro* degradation behavior of GelMA and GC<sub>m</sub> hydrogels.

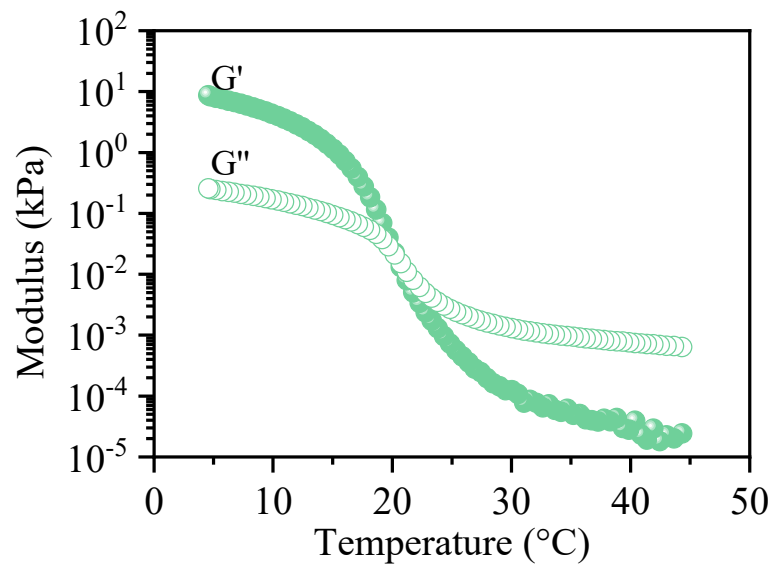

**Figure S5.** Thermo-sensitivity measurement via temperature sweep from 5 °C to 45 °C.

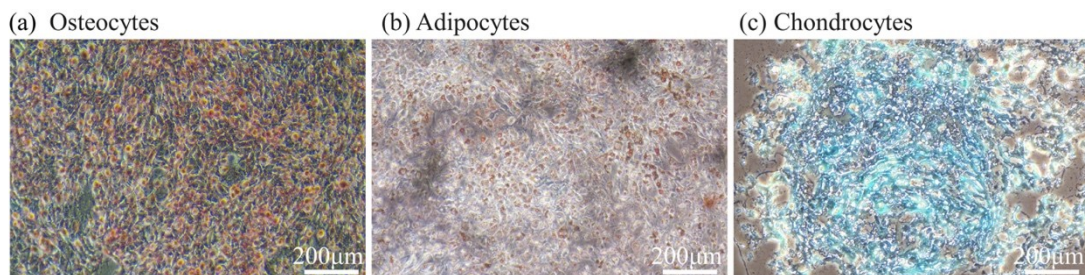

**Figure S6.** (a) Alizarin red staining, (b) Oil red O staining, (c) Alcian blue staining for osteogenically differentiated BMSCs, adipogenically differentiated BMSCs, and chondrogenically differentiated BMSCs, respectively.

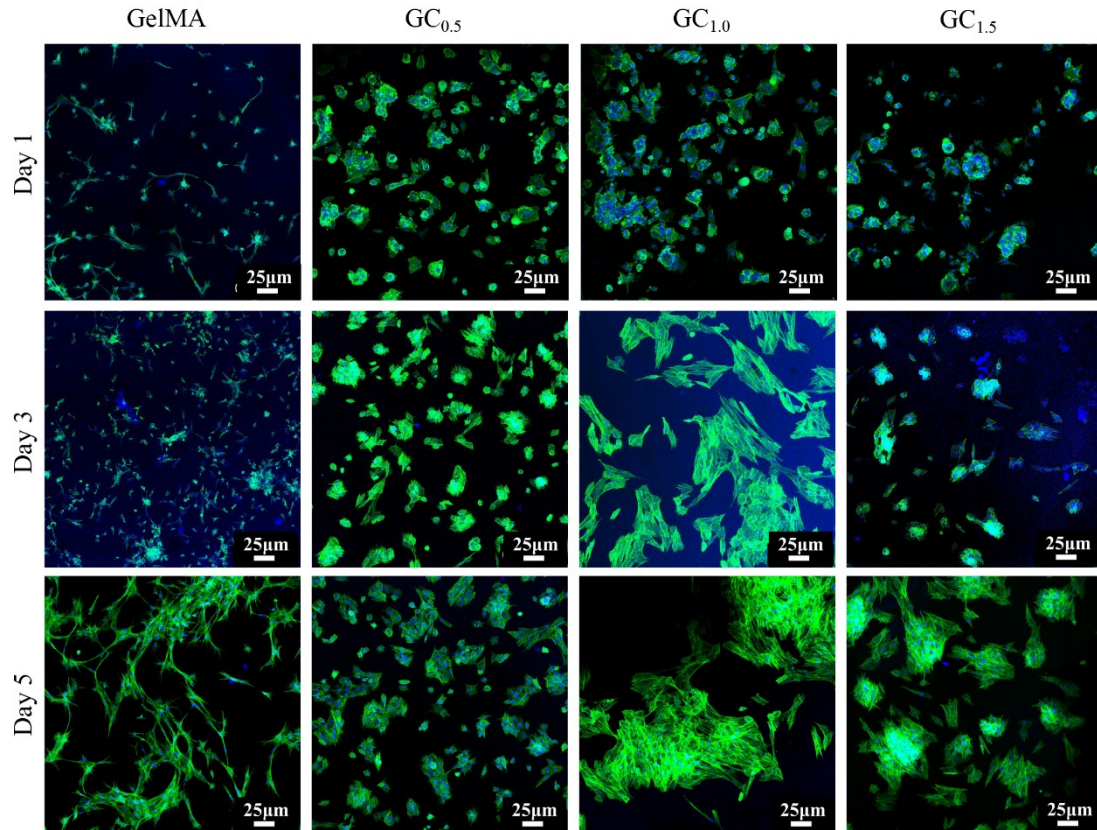

**Figure S7.** Fluorescence microscopy images of BMSCs micro-aggregate growth on the GelMA and  $GC_m$  hydrogel scaffolds (FITC-phalloidin for cytoskeleton, DAPI for nucleus) after 1, 3 and 5 days of culture, respectively.

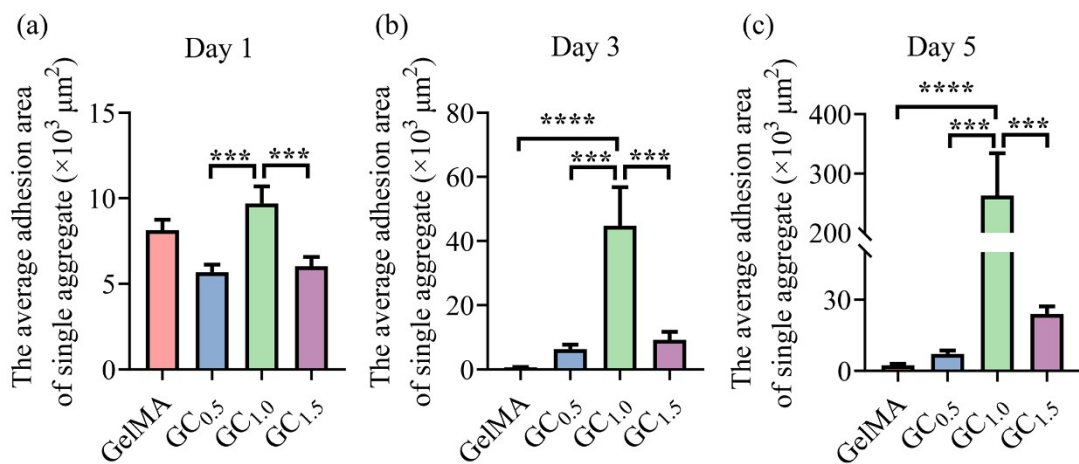

**Figure S8.** Adhesion area of each aggregate counted by the stained cellular

cytoskeleton at 1, 3 and 5 days.

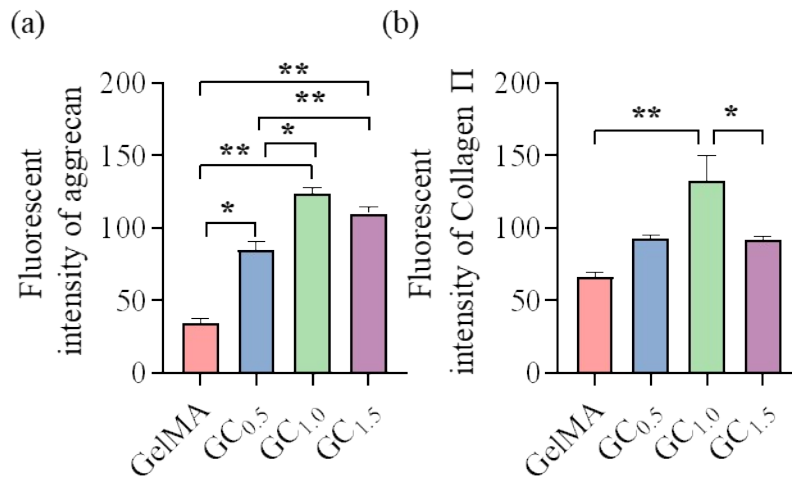

**Figure S9.** Fluorescent intensity analysis of (a) Aggrecan and (b) Collagen II protein expression.

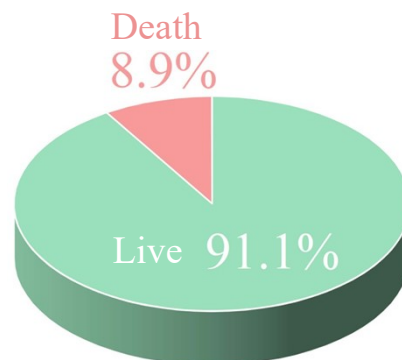

**Figure S10.** Survival rate of BMSCs cultured within 3D bioprinted hydrogel.

**Table S2.** (International Cartilage Repair Society) ICRS scoring system<sup>[1]</sup>

| Cartilage repair evaluation                                                         | Points |
|-------------------------------------------------------------------------------------|--------|
| <b>Degree of defect repair</b>                                                      |        |
| In level with surrounding cartilage                                                 | 4      |
| 75% repair of defect depth                                                          | 3      |
| 50% repair of defect depth                                                          | 2      |
| 25% repair of defect depth                                                          | 1      |
| 0% repair of defect depth                                                           | 0      |
| <b>Integration to border zone</b>                                                   |        |
| Complete integration with surrounding cartilage                                     | 4      |
| Demarcating border <1 mm                                                            | 3      |
| 3/4th of graft integrated, 1/4th with a notable border > 1 mm width                 | 2      |
| 1/2 of graft integrated with surrounding cartilage, 1/2 with a notable border >1 mm | 1      |
| From no contact to 1/4th of graft integrated with surrounding cartilage             | 0      |
| <b>Macroscopic appearance</b>                                                       |        |
| Intact smooth surface                                                               | 4      |
| Fibrillated surface                                                                 | 3      |
| Small, scattered fissures or cracs                                                  | 2      |
| Several, small or few but large fissures                                            | 1      |
| Total degeneration of grafted area                                                  | 0      |
| <b>Overall repair assessment</b>                                                    |        |
| Grade I: normal                                                                     | 12     |
| Grade II: nearly normal                                                             | 11-8   |
| Grade III: abnormal                                                                 | 7-4    |
| Grade IV: severely abnormal                                                         | 3-1    |

**Table S3.** The modified O’Driscoll histologic score<sup>[2]</sup>

| Characteristic                                             | Score |
|------------------------------------------------------------|-------|
| I. Hyaline cartilage (%)                                   |       |
| 80–100                                                     | 8     |
| 60–80                                                      | 6     |
| 40–60                                                      | 4     |
| 20–40                                                      | 2     |
| 0–20                                                       | 0     |
| II. Structural characteristics                             |       |
| A. Surface irregularity                                    |       |
| Smooth and intact                                          | 2     |
| Fissures                                                   | 1     |
| Severe disruption, fibrillation                            | 0     |
| B. Structural integrity                                    |       |
| Normal                                                     | 2     |
| Slight disruption, including cysts                         | 1     |
| Severe lack of integration                                 | 0     |
| C. Thickness                                               |       |
| 100% of normal adjacent cartilage                          | 2     |
| 50% to 100% or thicker than normal                         | 1     |
| 0–50%                                                      | 0     |
| D. Bonding to adjacent cartilage                           |       |
| Bonded at both ends of graft                               | 2     |
| Bonded at one end/partially both ends                      | 1     |
| Not bonded                                                 | 0     |
| III. Freedom from degenerate changes in adjacent cartilage |       |
| Normal cellularity, no clusters, normal staining           | 3     |
| Normal cellularity, mild clusters, moderate staining       | 2     |
| Mild or mod hypocellularity, slight staining               | 1     |
| Severe hypocellularity, slight staining                    | 0     |
| IV. Reconstitution of subchondral bone                     |       |
| Complete reconstitution                                    | 2     |
| Greater than 50% recon                                     | 1     |
| 50% or less recon                                          | 0     |
| V. Safranin O staining                                     |       |
| >80% homogeneous positive stain                            | 2     |
| 40%–80% homogeneous positive                               | 1     |



|             |                                 |       |
|-------------|---------------------------------|-------|
|             | stain                           |       |
|             | <40% homogeneous positive stain | 0     |
| Total score |                                 | Max23 |

---

## Reference

[1] M. P. J. Van den Borne, N. J. H. Raijmakers, J. Vanlauwe, J. Victor, S. N. De Jong, J.

Bellemans, D. B. F. Saris. *Osteoarthritis and Cartilage*. **2007**. 15(12), 1397-1402.

[2] Orth Patrick, Madry Henning. *Histology and histopathologi*, **2015**, 30(8), 911-919.
